# Supplementary material for: Vagal Transient Receptor Potential Ankyrin 1 Mediates Stress-exacerbated Visceral Mechanonociception After Antral Cold Exposure
Source: PubMed Central journal article supplement — J Neurogastroenterol Motil. 2019 Jul 30;25(3):442–60. doi: 10.5056/jnm19014 (PMC6657933; doi:10.5056/jnm19014), 2019-07-30
Supplement: jnm-25-442_Supple.pdf [file jnm-25-442_Supple.pdf]

**Supplementary Table 1.** Primary Antibodies Used in Immunohistochemical Staining

| Primary antibody     | Catalog No. | Dilution | Company                   | Reference      |
|----------------------|-------------|----------|---------------------------|----------------|
| Rabbit anti-p-ERK1/2 | 9101        | 1:200    | Cell Signaling Technology | PMID: 27920126 |
| Mouse anti-p-ERK1/2  | 5726        | 1:300    | Cell Signaling Technology | PMID: 27809309 |
| Rabbit anti-c-Fos    | ab102699    | 1:200    | Abcam                     | PMID: 25756354 |
| Rabbit anti-TRPA1    | ab58844     | 1:400    | Abcam                     | PMID: 25023795 |
| Rabbit anti-TRPA1    | GTX54765    | 1:200    | GeneTex                   | -              |
| Rabbit anti-TRPM8    | ab74845     | 1:400    | Abcam                     | PMID: 21489690 |

p-ERK1/2, phospho-extracellular signal-regulated protein kinase 1/2; c-Fos, FBJ osteosarcoma oncogene; TRPA1, transient receptor potential ankyrin 1; TRPM8, transient receptor potential melastatin 8.

**Supplementary Table 2.** Chronic Stress-induced Inflammatory Cell Infiltration in Antral Mucosa

|                 | Neutrophils<br>(cells/HP) | Mononuclear cells<br>(cells/HP) |
|-----------------|---------------------------|---------------------------------|
| Sham stress     | 4.1 ± 0.6                 | 9.6 ± 2.0                       |
| Stress          | 10.2 ± 3.3                | 16.5 ± 2.1                      |
| <i>P</i> -value | 0.047                     | 0.033                           |

HP, high power field.

Rats were subjected to water avoidance stress 1 hour each day or sham stress for 10 consecutive days. Cell populations were counted at ×400 magnification in 8 different areas of mucosa and submucosa in each section.

Values are mean ± SEM; n = 5 per group.

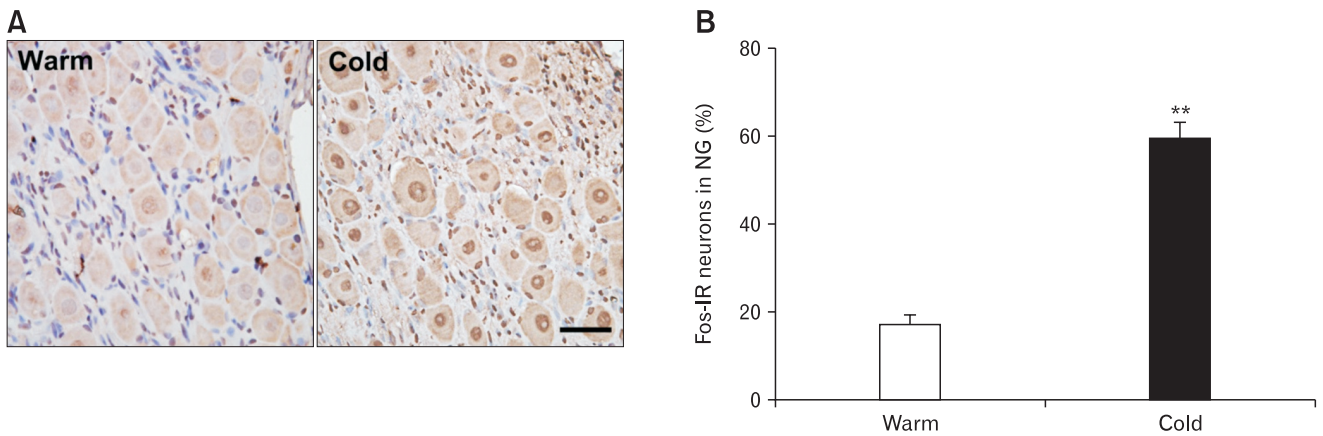

**Supplementary Figure 1.** Representative photomicrographs showing FBJ osteosarcoma cellular oncogene (c-Fos) expression in nodose neurons. (A) Fos immunoreactivity (IR) was not evident in nodose ganglia from rats receiving intra-antral infusion of warm saline (at 37°C). In contrast, intra-antral infusion of cold saline (at 4°C) markedly increased the number of Fos-IR neurons in nodose ganglia. (B) The percentage of c-Fos-IR neurons was calculated in 3 rats (6 ganglia) per group. \*\* $P < 0.01$  (Student's  $t$  test). Scale bar = 100  $\mu\text{m}$ . NG, nodose ganglia.

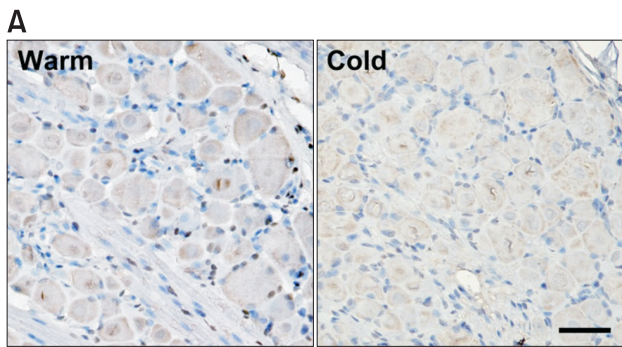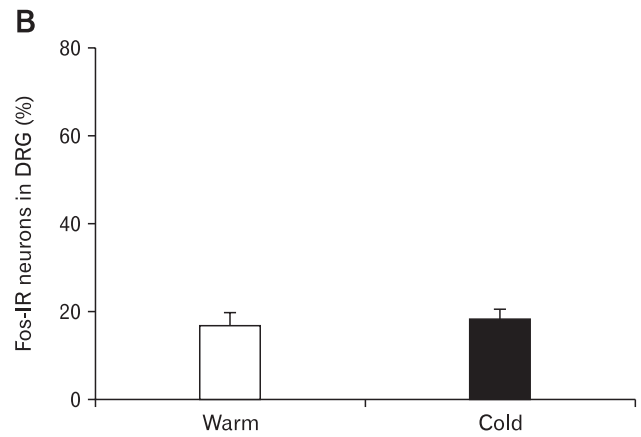

**Supplementary Figure 2.** Representative photomicrographs showing FBJ osteosarcoma cellular oncogene (c-Fos) expression in thoracic (T6-10) dorsal root neurons. (A) Fos immunoreactivity (IR) was similar in dorsal root ganglia (DRG) from rats receiving intra-antral infusion of warm and cold saline. (B) The percentage of c-Fos-IR neurons was calculated in 3 rats (6 ganglia) per group. Scale bar = 100  $\mu$ m.

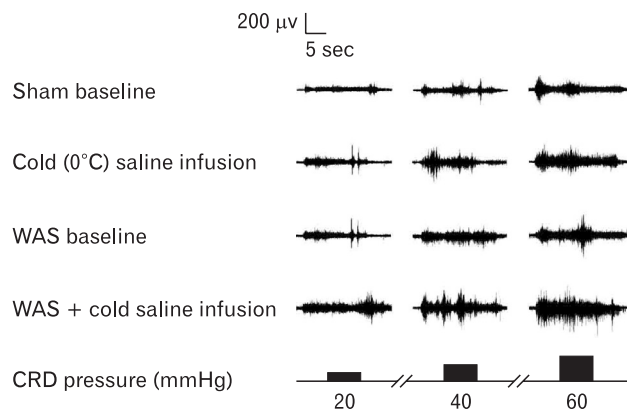

**Supplementary Figure 3.** Representative electromyogram (EMG) recordings depicting the visceromotor response (VMR) to colorectal distention (CRD) at 20, 40, and 60 mmHg before and after antral infusion of cold saline in rats previously subjected to a 10-day sham stress or water avoidance stress (WAS).

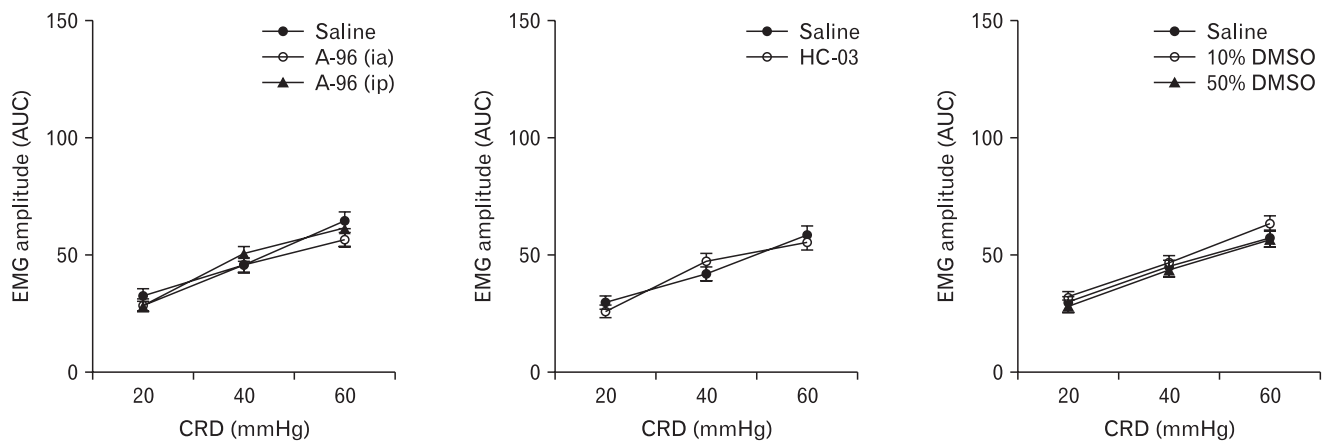

**Supplementary Figure 4.** The inhibitors of transient receptor potential ankyrin 1 had no effect on the visceromotor response (VMR) to colorectal distention (CRD). A-967079 (A-96) (A), HC-030031 (HC-03) (B), and the vehicles (50% and 10% dimethyl sulfoxide [DMSO]), respectively; C) alone did not affect the VMR to CRD ( $n = 5$  rats per group). EMG, Electromyogram; AUC, area under the curve.

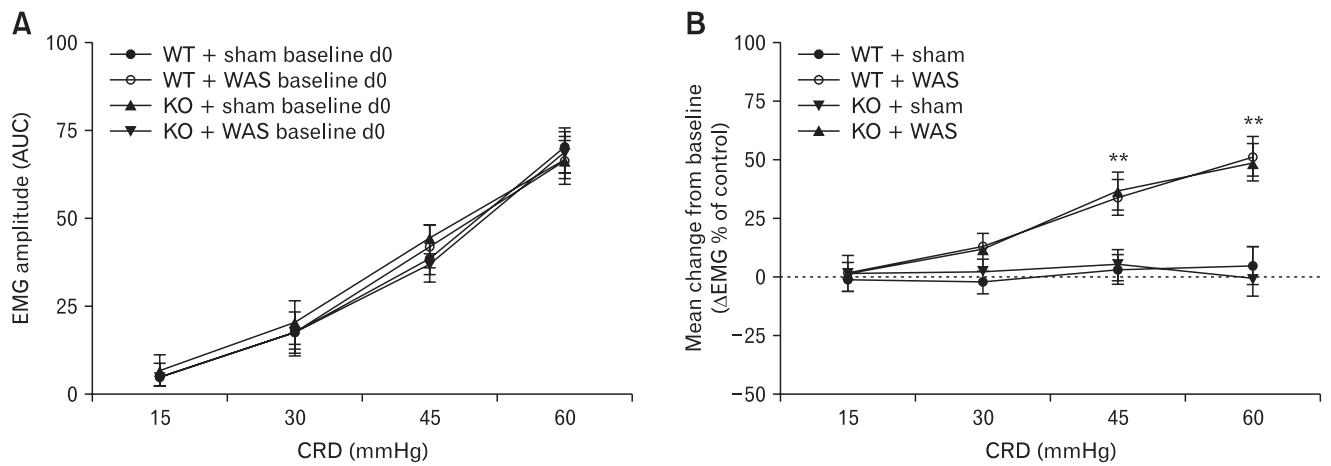

**Supplementary Figure 5.** Effect of chronic stress on the visceromotor response (VMR) to colorectal distention (CRD) in wild type (WT) and transient receptor potential ankyrin 1 (TRPA1)-knockout (KO) mice. (A) The baseline VMR to CRD before sham stress or stress (on day 0) in WT and TRPA1- KO mice. (B) Effect of a 9-day water avoidance stress (WAS) on VMR to CRD in WT and TRPA1-KO mice.  $n = 8$  per group. Data are expressed as mean  $\pm$  SEM of VMR expressed as mean change of EMG amplitude from the baseline response on day 0. **\*\*** $P < 0.01$  vs sham stress groups (2-way ANOVA followed by Bonferroni post-test comparisons). EMG, Electromyogram; AUC, area under the curve.

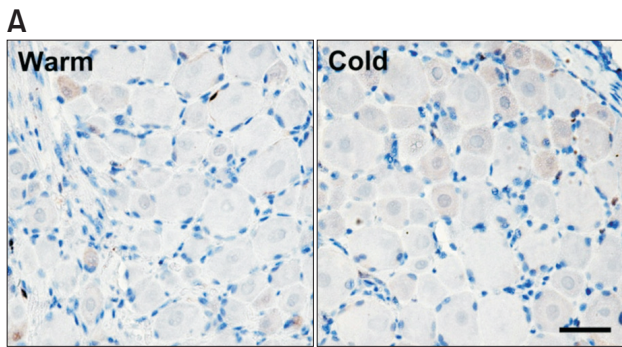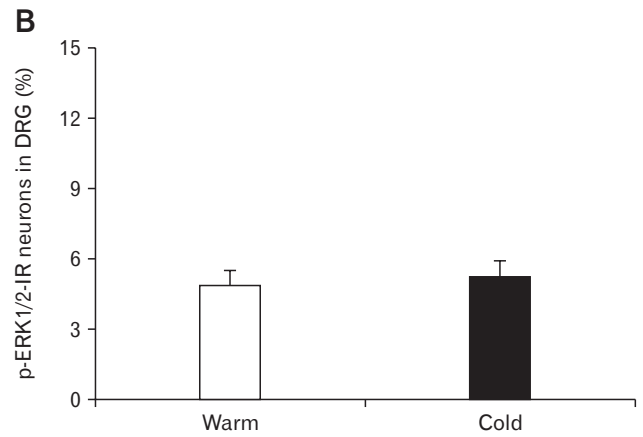

**Supplementary Figure 6.** Intra-antral cold stimulation had no effect on phosphorylation of extracellular signal-regulated protein kinase 1/2 (p-ERK1/2) in rat dorsal root ganglia (DRG). (A) Phospho-ERK labelling in dorsal root neurons 10 minutes after intra-antral infusion of warm or cold saline. (B) The percentage of p-ERK1/2-immunoreactive (IR) neurons was calculated in 3 rats (6 ganglia) per group. Scale bar = 100  $\mu$ m.
